# Supplementary material for: Nucleation and growth of blue phase liquid crystals on chemically-patterned surfaces: a surface anchoring assisted blue phase correlation length
Source: Royal Society of Chemistry journal article supplement (doi:10.1039/d1me00044f), 2021-01-01
Supplement: d1me00044f1.pdf [file d1me00044f1.pdf]

# **Nucleation and Growth of Blue Phase Liquid Crystals on Chemically Patterned Surfaces: A Surface Anchoring Assisted Blue Phase Correlation Length**

## **Supporting Information**

*Xiao Li<sup>1\*</sup>, Kangho Park<sup>2,3</sup>, Orlando. Guzmán<sup>2,4</sup>, José A. Martínez-González<sup>5</sup>, James A Dolan<sup>6</sup>, Juan J. de Pablo<sup>2,7</sup> and Paul F. Nealey<sup>2,7\*</sup>*

<sup>1</sup>Department of Materials Science and Engineering, University of North Texas, Denton, TX 76203, USA.

<sup>2</sup>Pritzker School of Molecular Engineering, The University of Chicago, Chicago, IL 60637, Unites States.

<sup>3</sup>Department of Chemical and Biomolecular Engineering, Korea Advanced Institute of Science and Technology (KAIST), Daejeon 34141, South Korea.

<sup>4</sup>Departamento de Física, Universidad Autónoma Metropolitana Iztapalapa, Av. San Rafael Atlixco 186, Ciudad de México 09340, México.

<sup>5</sup>Facultad de Ciencias, Universidad Autónoma de San Luis Potosí, Lateral Av. Salvador Nava s/n, San Luis Potosí 78290, SLP, México.

<sup>6</sup>Department of Chemistry, University of Cambridge, Lensfield Road, Cambridge, CB2 1EW, UK

<sup>7</sup>Center for Molecular Engineering, Argonne National Laboratory, Lemont, IL 60439, United States.

\*Correspondence to: [Xiao.Li@unt.edu](mailto:Xiao.Li@unt.edu); [nealey@uchicago.edu](mailto:nealey@uchicago.edu)

Keywords: blue phase liquid crystal, directed self-assembly, chemical pattern, crystal growth, correlation length

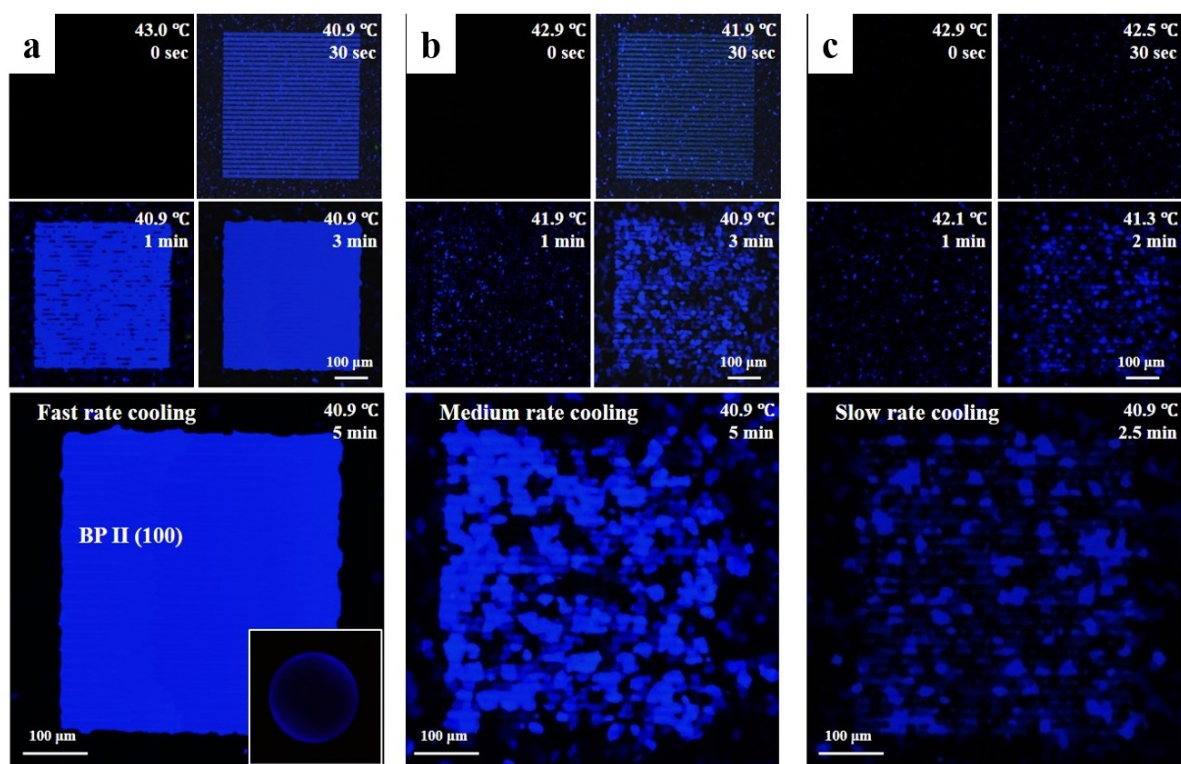

**Figure S1.** Reflection POM images of BPII<sub>(100)</sub> on the short-type chemical pattern ( $w_p = 10 \mu\text{m}$ ,  $w_h = 5 \mu\text{m}$ ) according to different cooling processes: **a)** fast cooling, **b)** medium cooling, and **c)** slow cooling.

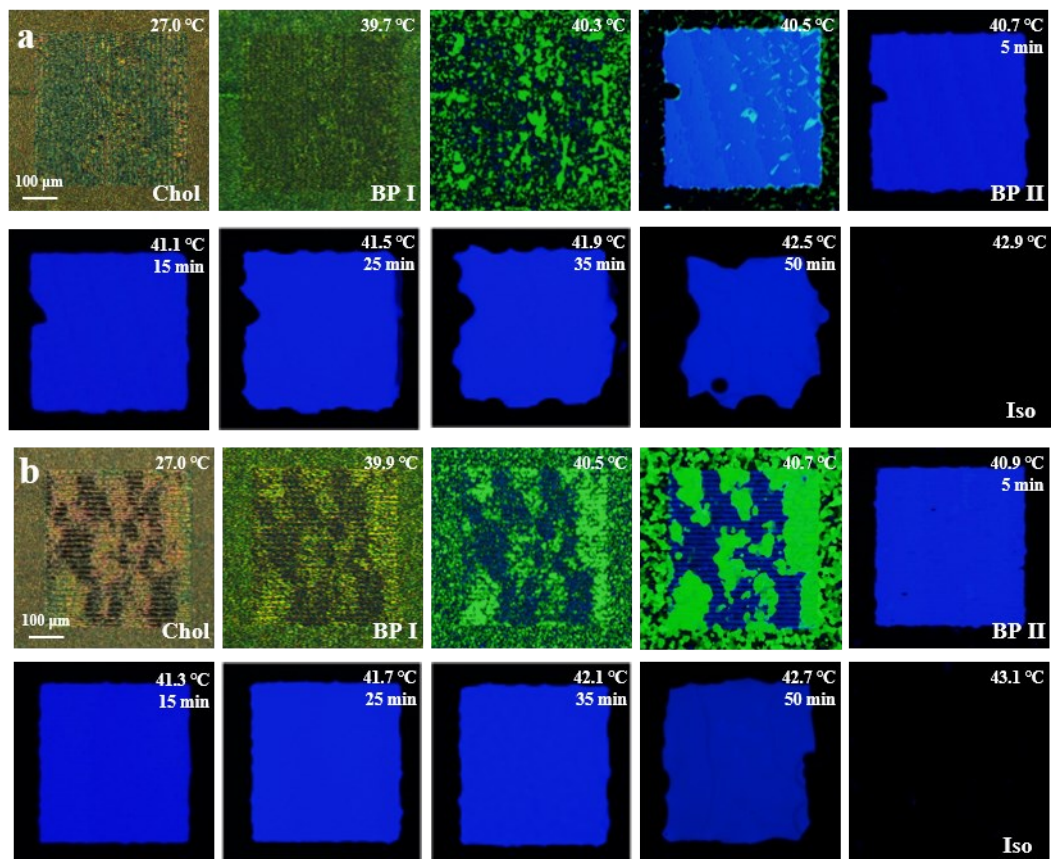

**Figure S2.** Reflection POM images of BP transition by slow heating (0.04 °C /min) process on a) long-type pattern for and b) short-type pattern, with  $w_p = 10 \mu\text{m}$ ,  $w_h = 5 \mu\text{m}$ .
